# Supplementary material for: Encouragement for Faculty to Implement Vision and Change
Source: Atypon-hosted journal article supplement (doi:10.1187/cbe.16-03-0127), 2016-11-03
Supplement: combinedsupmats.pdf [file combinedsupmats.pdf]

# Supplemental Material

*CBE—Life Sciences Education*

Harvey *et al.*

**Default Question Block**

**Survey for Bio113 & 114 Students using Echo360**

This survey is completely anonymous and optional. Approximately 5 minutes or less to complete this survey

**Choose your class**

- BIO113 Integrated Concepts in Biology I (Prof. Malcolm Campbell)
- BIO114 Integrated Concepts in Biology II (Prof. Kevin Smith)

Why did you choose to take  $\{q://QID20/ChoiceGroup/SelectedChoices\}$ ?

**Did you find the Echo360 technology helpful?**

|                       |                       |                       |                       |                       |                       |                       |                       |                       |                       |                       |              |
|-----------------------|-----------------------|-----------------------|-----------------------|-----------------------|-----------------------|-----------------------|-----------------------|-----------------------|-----------------------|-----------------------|--------------|
| Very unhelpful        |                       |                       |                       |                       | Neutral               |                       |                       |                       |                       |                       | Very helpful |
| 0                     | 1                     | 2                     | 3                     | 4                     | 5                     | 6                     | 7                     | 8                     | 9                     | 10                    |              |
| <input type="radio"/> |              |

**additional comments (optional)**

**Rate the five types of Echo360 features**

|                                               | Very unhelpful        |                       |                       | Neutral               |                       |                       | Very helpful          |
|-----------------------------------------------|-----------------------|-----------------------|-----------------------|-----------------------|-----------------------|-----------------------|-----------------------|
| access to slides during class                 | <input type="radio"/> |
| access to slide after class                   | <input type="radio"/> |
| access to recorded class afterwards           | <input type="radio"/> |
| in-class use of quizzes/activities            | <input type="radio"/> |
| online asking/answering questions via Echo360 | <input type="radio"/> |
| flagging slides as confusing                  | <input type="radio"/> |

When working on your own outside of class, what percentage of the time were you also doing other activities such as checking FaceBook posts, texting, watching a movie?

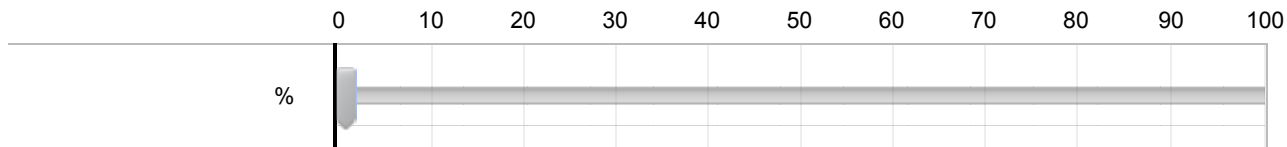

At the START of the semester, how did you feel about using an online-only textbook? (add comments if necessary)

Unhappy 0 1 2 3 4 5 Neutral 6 7 8 9 10 Happy

additional comments (optional)

At the END of the semester, how did you feel about using an online-only textbook? (add comments if necessary)

Unhappy 0 1 2 3 4 5 Neutral 6 7 8 9 10 Happy

additional comments (optional)

What do you typically do to prepare prior to coming to class? (check all that apply)

- read the assignment
- attempt to answer questions (verbally or in writing)
- review material a second time
- look at Echo360 slides to be used in class
- none of the above
- other

We'd like to understand how you prefer to take notes for this class. Select all that apply.

- paper and pen notes in notebook
- electronic notes outside Echo360
- electronic notes within Echo360
- written notes on hard copy of PowerPoint slides

Did your note taking preferences (electronic vs. paper) change as the semester progressed?

- Yes
- No

You answered yes. In what way did they change your note taking preferences?

Please indicate if you agree or disagree with these statements:

|                                                                                                           | Strongly agree        | Agree                 | Neutral               | Disagree              | Strongly Disagree     |
|-----------------------------------------------------------------------------------------------------------|-----------------------|-----------------------|-----------------------|-----------------------|-----------------------|
| Learning about some researchers gave me a better sense of what researchers are like as people.            | <input type="radio"/> |
| Biologists and scientific researchers can come from a variety of personal and educational backgrounds.    | <input type="radio"/> |
| Learning about some researchers' backgrounds made me feel confident that I could be a research scientist. | <input type="radio"/> |
| I would have liked to have learned about researchers' backgrounds more frequently.                        | <input type="radio"/> |
| I would take this course again if I had it to do over.                                                    | <input type="radio"/> |
| I would recommend this course to my friends.                                                              | <input type="radio"/> |

Demographic data:

Did either parent complete at least two years of college?

- Yes
- No

Uncertain

Did you take AP Biology course (regardless of taking test or not)

Yes

No

Do you participate in varsity athletics at Davidson College?

Yes (which one)

No
